# Supplementary material
Source: PubMed Central journal article supplement (PMC3434744)
Supplement: supp_194.13.3426_FigS1-S2_TableS1-S2.pdf [file supp_194.13.3426_FigS1-S2_TableS1-S2.pdf]

Figure S1. Estimation of ParB concentration in cell-free extracts

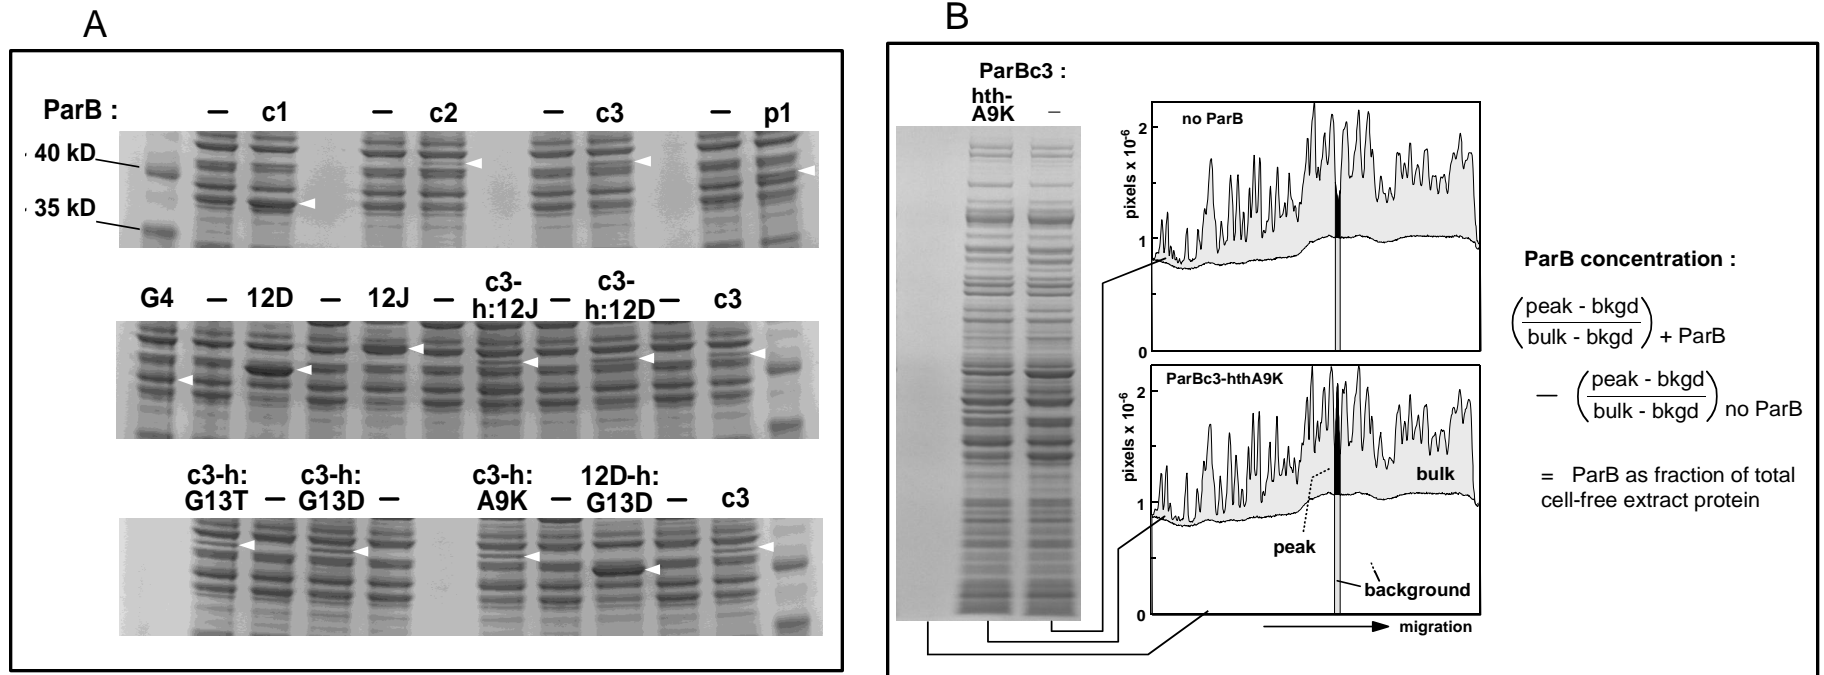

**A.** Electrophoretic fractionation of extract proteins in denaturing polyacrylamide gels; only the segments including ParB polypeptides (arrowheads) are shown. Lanes containing no protein (omitted from the example shown in the second panel) or protein from cells without ParB were included to enable quantitation. Stained gel images were captured with a gel-imager (Syngene G box) as .tif files and processed using Multi Gauge (Fuji). Size standards are the prestained PageRuler proteins from Fermentas. All ParB polypeptides migrated as species 5-10 kD larger than these markers; abnormal migration of ParB family proteins has been observed previously (e.g. Phua, S. H., P. L. Bergquist, and H. E. Lane. 1982. Effects of Tn5 insertion in the incD region on mini-F maintenance and polypeptide synthesis. Mol. Gen. Genet. 188:353–355.). **B.** Method for estimating ParB concentrations. The example of ParBc3-hthA9K, including empty and non-ParB lanes, is shown. Total protein was estimated by subtracting the entire background (empty lane) scan from that of the protein-containing lanes, and ParB by applying the same process to the defined peak area. The difference of the two ParB/total protein fractions gives ParB as a proportion of the 3.5 µg of protein loaded in each lane. Obviously, such a procedure can only yield approximate values, but cases where replicate estimates were made (Table S1; *B.cen* c3, *R.Pic* 12D c1) indicate that it is accurate within a factor of about 2.5.

Figure S2. EMSA with ParB proteins and *parS* sequences from Bsr2, Bsr4 and Bsr6

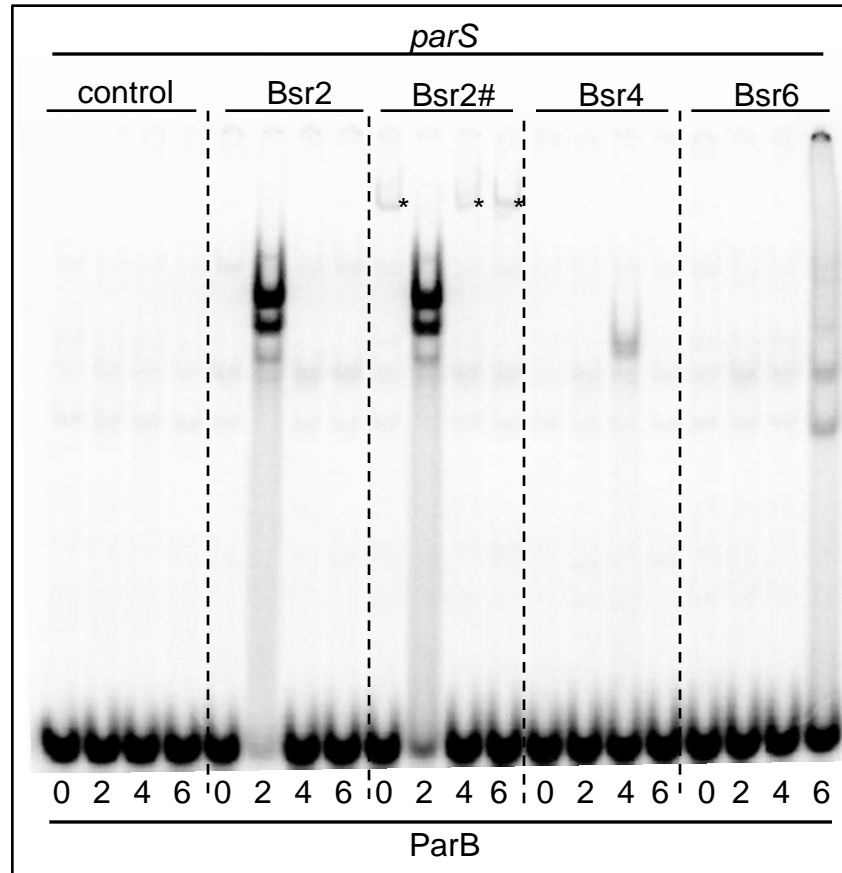

The ParB protein overexpressed in the extract is indicated below each lane as follows: 0 - no ParB; 2 – Bsr2-ParB from *B.cenocepacia* chromosome 2; 4 – Bsr4-ParB from the Mega-plasmid of *Ralstonia solanacearum* GM11000; 6 – Bsr6-ParB, from the plasmid 2 of *Polaromonas naphthalenivorans* CJ2 (pNAP2). The *parS* probes are indicated above each panel and have the following internal sequences: control – ctagtcgtacgactag; Bsr2 – gtttatgcgcataaac; Bsr2# (a secondary site of *B.cen c2*) gtttatgcgcacaaac; Bsr4 – ctttcagcgctgaaag; Bsr6 - tgttctgcgcagaaca. The asterisk indicates a complex formed by an *E. coli* protein with *parS*-Bsr2#.

TABLE S1. ParB concentrations in cell-free extracts

| ParB                                             | monomer mol. wt. (kD) | % total protein | concentration in extract (µg/ml) |
|--------------------------------------------------|-----------------------|-----------------|----------------------------------|
| <i>B. cenocepacia</i> J2315 c1                   | 33.0                  | 3.7             | 2.8                              |
| <i>B. cenocepacia</i> J2315 c2                   | 39.6                  | 1.6             | 1.1                              |
| <i>B. cenocepacia</i> J2315 c3                   | 37.5                  | 1.5, 1.0, 1.9   | 1.1                              |
| <i>B. cenocepacia</i> J2315 pBC                  | 34.9                  | 0.6             | 0.4                              |
| <i>B. vietnamiensis</i> G4 p2                    | 32.0                  | 0.9             | 0.6                              |
| <i>R. pickettii</i> 12D p1                       | 32.8                  | 2.6             | 1.9                              |
| <i>R. pickettii</i> 12J c1::p                    | 32.9                  | 2.4             | 2.0                              |
| <i>B. cenocepacia</i> c3-hth12J <sup>a</sup>     | 37.5                  | 1.1             | 0.8                              |
| <i>B. cenocepacia</i> c3-hth12D <sup>a</sup>     | 37.5                  | 0.9             | 0.6                              |
| <i>B. cenocepacia</i> c3-hth.G13T <sup>a</sup>   | 37.5                  | 1.3             | 0.9                              |
| <i>B. cenocepacia</i> c3-hth.G13D <sup>a</sup>   | 37.5                  | 2.3             | 1.6                              |
| <i>B. cenocepacia</i> c3-hth.A9K <sup>a</sup>    | 37.5                  | 2.3             | 1.8                              |
| <i>R. pickettii</i> 12D p1-hth.D13G <sup>a</sup> | 32.8                  | 5.1             | 4.0                              |

C1, c2 and c3 refer to chromosome 1, chromosome 2 and chromosome 3 of the indicated species. pBC refers to the plasmid of *B. cenocepacia* J2315. P1 and p2 refer to plasmids 1 and 2 of the indicated species. C1::p refers to the plasmid integrated in c1 of *R. pickettii* 12J. <sup>a</sup> proteins modified as indicated in Fig. 6

TABLE S2. ParB proteins used for the phylogenetic analysis

| BsrType | Strain                                     | Prot. Acces.N° | Locus tag            | Uniprot | Genome <sup>a</sup> |
|---------|--------------------------------------------|----------------|----------------------|---------|---------------------|
| RepB    | <i>Agrobacterium tumefaciens</i>           | YP_001967488.1 | pTiBo087             | A5WY07  | pTiBo542            |
| RepB    | <i>Rhizobium leguminosarum</i> viciae 3841 | YP_770903.1    | pRL80002             | Q1M9K4  | pRL8                |
| RepB    | <i>Agrobacterium vitis</i> S4              | YP_002542550.1 | Avi_9002             | B9K3B7  | pAtS4c              |
| RepB    | <i>Nitrobacter hamburgensis</i> X14        | YP_571717.1    | Nham_4280            | Q1QFW2  | pNITHX1             |
| RepB    | <i>Sinorhizobium meliloti</i> BL225C       | ZP_07581171.1  | SinmeBDRAFT_1526     | E0JCB8  | -                   |
| RepB    | <i>Rhizobium etli</i> IE4771               | ZP_03514520.1  | RetI_010100002436    | -       | -                   |
| RepB    | <i>Methylobacterium nodulans</i> ORS 2060  | YP_002498945.1 | Mnod_3735            | B8IRA2  | -                   |
| RepB    | <i>Mesorhizobium</i> sp. BNC1              | YP_665972.1    | Meso_4355            | Q11MP4  | pBNC1-1             |
| RepB    | <i>Bradyrhizobium</i> sp. BTAi1            | YP_001220373.1 | BBta_p0002           | A5EU57  | pBBta01             |
| chr1    | <i>Burkholderia ambifaria</i> IOP40-10     | ZP_02890508    | BamIOP4010DRAFT-2571 | B1FEW1  | -                   |
| chr1    | <i>Burkholderia ambifaria</i> MC40-6       | YP_001806815   | BamMC406_0097        | B1YQK5  | chr1                |
| chr1    | <i>Burkholderia ambifaria</i> AMMD         | ABI85648       | Bamb_0087            | Q0BJM5  | chr1                |
| chr1    | <i>Burkholderia ambifaria</i> MEX-5        | ZP_02905066    | BamMEX5DRAFT_0420    | B1SY04  | -                   |
| chr1    | <i>Burkholderia cenocepacia</i> AU 1054    | ABF77855       | Bcen_2959            | Q1BRA0  | chr1                |
| chr1    | <i>Burkholderia cenocepacia</i> MC0-3      | ACA89293       | Bcenmc03_0113        | B1JSU8  | chr1                |
| chr1    | <i>Burkholderia cenocepacia</i> HI2424     | ABK06850       | Bcen2424_0096        | A0K2X3  | chr1                |
| chr1    | <i>Burkholderia cenocepacia</i> PC184      | ZP_04940010    | BCPG_01446           | A2VTY5  | -                   |
| chr1    | <i>Burkholderia</i> sp. 383                | ABB06880       | Bcep18194_A3278      | Q39KY6  | chr1                |
| chr1    | <i>Burkholderia vietnamiensis</i> G4       | ABO53128       | Bcep1808_0105        | A4JA25  | chr1                |
| chr1    | <i>Burkholderia ubonensis</i> Bu           | ZP_02380326    | BuboB_010100021506   | -       | -                   |
| chr1    | <i>Burkholderia multivorans</i> CGD1       | ZP_03587270    | BURMUCGD1_0048       | B9BCF5  | -                   |
| chr1    | <i>Burkholderia multivorans</i> CGD2       | ZP_03581750    | BURMUCGD2_0046       | B9BZG0  | -                   |
| chr1    | <i>Burkholderia multivorans</i> ATCC 17616 | BAG45043       | BMULJ_03169          | A9AJF4  | chr1                |
| chr1    | <i>Burkholderia dolosa</i> AUO158          | ZP_04944299    | BDAG_00147           | A2W674  | -                   |
| chr1    | <i>Burkholderia glumae</i> BGR1            | YP_002909975   | bglu_1g00680         | C5A862  | chr1                |
| chr1    | <i>Burkholderia xenovorans</i> LB400       | ABE32896       | Bxe_A0031            | Q13SP3  | chr1                |
| chr1    | <i>Burkholderia graminis</i> C4D1M         | ZP_02885466    | BgramDRAFT_4276      | B1G4P2  | -                   |
| chr1    | <i>Burkholderia phytofirmans</i> PsJN      | ACD18289       | Bphyt_3902           | B2T7K8  | chr1                |
| chr1    | <i>Burkholderia phymatum</i> STM815        | YP_001859252   | Bphy_3036            | B2JJK8  | chr1                |
| chr1    | <i>Ralstonia solanacearum</i> GMI1000      | NP_521444      | RSc3325              | Q8XU68  | chr1                |
| chr1    | <i>Ralstonia pickettii</i> 12D             | YP_002983134   | Rpic12D_3195         | C6BH88  | chr1                |
| chr1    | <i>Ralstonia pickettii</i> 12J             | YP_001901072   | Rpic_3520            | B2UGV7  | chr1                |
| chr1    | <i>Polaromonas naphthalenivorans</i> CJ2   | ABM35394       | Pnap_0068            | A1VIB6  | chr1                |
| chr1    | <i>Polaromonas</i> sp. JS666               | ABE42045       | Bpro_0078            | Q12HE7  | chr1                |
| chr1    | <i>Rhodiferax ferrireducens</i> DSM 15236  | ABD67815       | Rfer_0053            | Q223L5  | chr1                |
| chr1    | <i>Acidovorax ebreus</i> TPSY              | YP_002551539   | Dtpsy_0050           | B9M9W8  | chr1                |
| Bsr1_a  | <i>Burkholderia cenocepacia</i> HI2424     | ABK13603       | Bcen2424_6874        | A0B4V9  | plasmid1            |
| Bsr1_a  | <i>Burkholderia cenocepacia</i> J2315      | YP_002235439   | pBCA002              | B4EQN6  | pBCJ2315            |
| Bsr1_a  | <i>Burkholderia glumae</i> BGR1            | YP_002909815   | bglu1p0020           | C5AMY6  | bglu_1p             |
| Bsr1_a  | <i>Burkholderia ambifaria</i> IOP40-10     | ZP_02888520    | BamIOP4010DRAFT_0582 | B1F973  | -                   |
| Bsr1_a  | <i>Burkholderia multivorans</i> ATCC 17616 | YP_001573704   | Bmul_6251            | A9AU38  | pBMUL01             |
| Bsr1_a  | <i>Burkholderia multivorans</i> ATCC 17616 | BAG48097       | BMULJ_06311          | A9AU38  | pTGL1               |
| Bsr1_b  | <i>Polaromonas naphthalenivorans</i> CJ2   | YP_973272      | Pnap_4247            | A1VV52  | pPNAP01             |
| Bsr2    | <i>Burkholderia xenovorans</i> LB400       | ABE32970       | Bxe_B3027            | Q13SG9  | chr2                |
| Bsr2    | <i>Burkholderia phytofirmans</i> PsJN      | ACD21298       | Bphyt_7010           | B2T7Y2  | chr2                |
| Bsr2    | <i>Burkholderia graminis</i> C4D1M         | ZP_02882092    | BgramDRAFT_0901      | B1FUM7  | -                   |
| Bsr2    | <i>Burkholderia phymatum</i> STM815        | YP_001860319   | Bphy_4152            | B2JPT2  | chr2                |
| Bsr2    | <i>Burkholderia mallei</i> NCTC 10229      | ABM98834       | BMA10229_1423        | -       | chr2                |
| Bsr2    | <i>Burkholderia pseudomallei</i> K96243    | CAH39837       | BPSS2350             | Q63HR9  | chr2                |
| Bsr2    | <i>Burkholderia pseudomallei</i> 1106a     | ABN95486       | BURPS1106A_A3177     | A3PA46  | chr2                |
| Bsr2    | <i>Burkholderia mallei</i> JHU             | ZP_04915784    | BMAJHUJ_0006         | -       | -                   |

|        |                                     |              |                      |        |             |
|--------|-------------------------------------|--------------|----------------------|--------|-------------|
| Bsr2   | Burkholderia glumae BGR1            | YP_002907735 | bglu_2g00020         | C5AKP4 | chr2        |
| Bsr2   | Burkholderia ubonensis Bu           | ZP_02376085  | BuboB_010100000065   | -      | -           |
| Bsr2   | Burkholderia multivorans ATCC 17616 | BAG47198     | BMULJ_05361          | A9AKT1 | chr2        |
| Bsr2   | Burkholderia multivorans CGD1       | ZP_03583495  | BURMUCGD1_5586       | B9B0W6 | -           |
| Bsr2   | Burkholderia multivorans CGD2       | ZP_03577302  | BURMUCGD2_6020       | B9BLR2 | -           |
| Bsr2   | Burkholderia dolosa AUO158          | ZP_04948154  | BDAG_04158           | A2WH79 | -           |
| Bsr2   | Burkholderia vietnamiensis G4       | ABO56777     | Bcep1808_3794        | A4JKH4 | chr2        |
| Bsr2   | Burkholderia cepacia AMMD           | ABI90515     | Bamb_4966            | Q0B5Q8 | chr2        |
| Bsr2   | Burkholderia ambifaria MC40-6       | YP_001809798 | BamMC406_3107        | B1YXN2 | chr2        |
| Bsr2   | Burkholderia ambifaria IOP40-10     | ZP_02890407  | BamIOP4010DRAFT_2470 | B1FEL0 | -           |
| Bsr2   | Burkholderia ambifaria MEX-5        | ZP_02906429  | BamMEX5DRAFT_1783    | B1T1W7 | -           |
| Bsr2   | Burkholderia sp. 383                | ABB10121     | Bcep18194_B0004      | Q39BP0 | chr2        |
| Bsr2   | Burkholderia cenocepacia MC0-3      | ACA93682.1   | Bcenmc03_4542        | B1K276 | chr2        |
| Bsr2   | Burkholderia cenocepacia HI2424     | ABK12427.1   | Bcen2424_5694        | A0B451 | chr2        |
| Bsr2   | Burkholderia cenocepacia AU 1054    | ABF80039.1   | Bcen_5165            | Q1BK16 | chr2        |
| Bsr2   | Burkholderia cenocepacia PC184      | ZP_04942860  | BPCPG_04404          | A2W235 | -           |
| Bsr2   | Burkholderia cenocepacia J2315      | YP_002232636 | BCAM0004             | B4EFY9 | chr2        |
| Bsr3_a | Burkholderia multivorans ATCC 17616 | BAG47206     | BMULJ_05369          | A9ATE3 | chr3        |
| Bsr3_a | Burkholderia multivorans CGD1       | ZP_03585227  | BURMUCGD1_6471       | B9B6L2 | -           |
| Bsr3_a | Burkholderia multivorans CGD2       | ZP_03578401  | BURMUCGD2_6710       | B9BPT9 | -           |
| Bsr3_a | Burkholderia cenocepacia HI2424     | ABK12926.1   | Bcen2424_6194        | A0KCL3 | chr3        |
| Bsr3_a | Burkholderia cenocepacia AU 1054    | ABF80692.1   | Bcen_5827            | Q1BI63 | chr3        |
| Bsr3_a | Burkholderia cenocepacia MC0-3      | ACA95785.1   | Bcenmc03_6671        | B1KC38 | chr3        |
| Bsr3_a | Burkholderia cenocepacia PC184      | ZP_04943653  | BPCPG_05224          | A2W4C8 | -           |
| Bsr3_a | Burkholderia cenocepacia J2315      | YP_002153395 | BCAS0002             | B4EQD0 | chr3        |
| Bsr3_a | Burkholderia sp. 383                | ABB06782.1   | Bcep18194_C7738      | Q39L84 | chr3        |
| Bsr3_a | Burkholderia vietnamiensis G4       | ABO58426.1   | Bcep1808_5482        | A4JQ73 | chr3        |
| Bsr3_a | Burkholderia cepacia AMMD           | ABI91545.1   | Bamb_6001            | Q0B2S8 | chr3        |
| Bsr3_a | Burkholderia ambifaria IOP40-10     | ZP_02891804  | BamIOP4010DRAFT_3867 | B1FIK7 | -           |
| Bsr3_a | Burkholderia ambifaria MC40-6       | YP_001815752 | BamMC406_5757        | B1Z603 | chr3        |
| Bsr3_a | Burkholderia ambifaria MEX-5        | ZP_02908427  | BamMEX5DRAFT_3781    | B1T7L5 | -           |
| Bsr3_a | Burkholderia dolosa AUO158          | EAY71634     | BDAG_04474           | A2WI38 | -           |
| Bsr3_a | Burkholderia ubonensis Bu           | ZP_02381864  | BuboB_010100029348   | -      | -           |
| Bsr3_b | Ralstonia pickettii 12D             | YP_002973646 | Rpic12D_5174         | C6BQP4 | pRp12D02    |
| Bsr3_b | Ralstonia pickettii 12J             | YP_001899080 | Rpic_1509            | B2UCJ6 | chr1        |
| Bsr3_c | Ralstonia pickettii 12D             | YP_002979969 | Rpic12D_5081         | C6BQ41 | pRp12D01    |
| Bsr3_d | Burkholderia vietnamiensis G4       | YP_001109717 | Bcep1808_7053        | A4JU13 | pBVIE02     |
| Bsr4   | Ralstonia pickettii 12D             | YP_002983826 | Rpic12D_3897         | C6BM46 | chr2        |
| Bsr4   | Ralstonia pickettii 12J             | YP_001892327 | Rpic_3784            | B2UH49 | chr2        |
| Bsr4   | Ralstonia solanacearum GMI1000      | NP_521565    | RSp0004              | Q8XTV0 | megaplasmid |
| Bsr4   | Cupriavidus metallidurans CH34      | YP_587948    | Rmet5820             | Q1LAZ7 | megaplasmid |
| Bsr4   | Cupriavidus pinatubonensis          | AAZ64689.1   | Reut_B5344           | Q46Q95 | chr2        |
| Bsr4   | Cupriavidus necator                 | CAJ94810.1   | H16_B0004            | Q0K5B4 | chr2        |
| Bsr4   | Cupriavidus taiwanensis LMG 19424   | YP_001796449 | RALTA_B0005          | B2AHG1 | chr2        |
| Bsr5_a | Polaromonas sp. JS666               | YP_551814    | Bpro_5044            | Q120X6 | p1          |
| Bsr5_b | Polaromonas sp. JS666               | YP_552265    | Bpro_5514            | Q11ZC5 | p2          |
| Bsr5_c | Rhodoferrax ferrireducens T118      | ABD71971     | Rfer_4284            | Q21QH4 | p1          |
| Bsr6   | Polaromonas naphthalenivorans CJ2   | ABM39747     | Pnap_4471            | A1VVR9 | pPNAP02     |
| Bsr7   | Burkholderia ambifaria IOP40-10     | ZP_02891570  | BamIOP4010DRAFT_3633 | B1FHX3 | -           |
| Bsr7   | Burkholderia ambifaria MEX-5        | ZP_02907883  | BamMEX5DRAFT_3237    | B1T621 | -           |
| Bsr7   | Burkholderia glumae BGR1            | YP_002913204 | bglu4p0020           | C5ANU1 | bglu_4p     |
| Bsr7   | Burkholderia multivorans CGD1       | ZP_03588332  | BURMUCGD1_6609       | B9BFG7 | -           |

<sup>a</sup> dash - incomplete genomes; chr - chromosome; p - plasmid
